# Supplementary material for: A Molecular Analysis of the Aminopeptidase P-Related Domain of PID-5 from Caenorhabditis elegans
Source: MDPI journal article supplement (doi:10.3390/biom13071132), 2023-07-14
Supplement: s1 [file s1]

## Supplementary material

**Supplementary Table S1.** Detailed apstatin interactions of APP-1 structures and PID-5 APP-RD (predicted, AlphaFold2 DB: Q9GUI6). Reference literature shown in parentheses: *Ce*APP-1 [24], *Pf*APP-1 [8,26] and *Ec*APP-1 [22,24].

| Protein                      | Residues                      | Apstatin Interactions |                |
|------------------------------|-------------------------------|-----------------------|----------------|
|                              |                               | APP-1                 | Apstatin       |
| <i>Ce</i> APP-1              | Arg78                         | NH1<br>NH1            | O3<br>O4       |
|                              | His392                        | NE2                   | O3             |
|                              | Asp413                        | OD2<br>OD1<br>OD2     | O1<br>N1<br>N1 |
|                              | His487                        | NE2                   | O2             |
|                              | His496                        | NE2                   | O2             |
|                              | Glu522                        | OE1<br>OE1<br>OE2     | O1<br>N2<br>O2 |
|                              | Glu536                        | OE1<br>OE2            | O1<br>O1       |
|                              | Zn <sup>2+</sup> <sub>A</sub> | -                     | O1             |
|                              | Zn <sup>2+</sup> <sub>B</sub> | -                     | N1<br>O1       |
| <i>Pf</i> APP-1              | Asp581                        | OD1                   | N1             |
|                              | His653                        | NE2                   | O2             |
|                              | Glu676                        | OE1                   | N2             |
|                              | Mn <sup>2+</sup> <sub>A</sub> | -                     | O1<br>O2       |
|                              | Mn <sup>2+</sup> <sub>B</sub> | -                     | O1             |
| <i>Ec</i> APP-1              | His243                        | NE2                   | O3             |
|                              | Asp260                        | OD1                   | N1             |
|                              | His361                        | NE2                   | O2             |
|                              | Glu383                        | OE1                   | O1             |
|                              | Mn <sup>2+</sup> <sub>A</sub> | -                     | O1             |
|                              | Mn <sup>2+</sup> <sub>B</sub> | -                     | N1<br>O1       |
| Predicted<br>PID-5<br>APP-RD | Gln857                        | NE2                   | O1             |
|                              | Glu929                        | OE1<br>OE1            | N4<br>N5       |
|                              | His932                        | NE2                   | N1             |
|                              | Glu950                        | OE1                   | N5             |
|                              | Arg979                        | NH1<br>NH2<br>NH2     | O1<br>O1<br>O2 |
|                              | Zn <sup>2+</sup> <sub>A</sub> | -                     | N1<br>O1       |

**Supplementary Table S2.** Complete interactions of CeAPP-1 with apstatin (PDB code: 4S2T). Equivalent residues in PID-5 APP-RD (AlphaFold2 DB: Q9GUI6) are shown on the same row and potential interactions of these residues with apstatin, in the binding pose from the highest scoring GOLD ligand docking, are shown.

| CeAPP-1 residues              | Apstatin interactions                                                                                                      | PID-5 APP-RD residues         | Potential apstatin interactions                                        |
|-------------------------------|----------------------------------------------------------------------------------------------------------------------------|-------------------------------|------------------------------------------------------------------------|
| Tyr43                         | Hydrophobic                                                                                                                | Leu492                        | Hydrophobic                                                            |
| Asp76                         | Hydrophobic                                                                                                                | Asp525                        | Hydrophobic                                                            |
| Arg78                         | 2 H-bonds side chain NH1 to apstatin O3 and O4                                                                             | Gly527                        | Hydrophobic                                                            |
| Phe378                        | Hydrophobic                                                                                                                | Gln825                        | Hydrophobic                                                            |
| Asp379                        | Hydrophobic                                                                                                                | Pro826                        | Hydrophobic                                                            |
| Ile381                        | Hydrophobic                                                                                                                | Ile828                        | Hydrophobic                                                            |
| His392                        | H-bond side chain NE2 to apstatin O3                                                                                       | Ala839                        | Hydrophobic                                                            |
| Asp413                        | 3 H-bonds to apstatin and metal coordination OD1 to Zn <sup>2+</sup> <sub>B</sub>                                          | Gln857                        | H-bond side chain NE2 to apstatin O1                                   |
| Asp424                        | Metal coordination side chain OD1 to Zn <sup>2+</sup> <sub>B</sub> and OD2 to Zn <sup>2+</sup> <sub>A</sub>                | Asn868                        | Lost metal coordination                                                |
| His483                        | Hydrophobic                                                                                                                | His928                        | Hydrophobic                                                            |
| Gly484                        | Hydrophobic                                                                                                                | Glu929                        | 2 H-bonds side chain OE1 to apstatin N4 and N5                         |
| Gly486                        | Hydrophobic                                                                                                                | Gly931                        | Hydrophobic                                                            |
| His487                        | H-bond side chain NE2 to apstatin O2 and Zn <sup>2+</sup> <sub>A</sub>                                                     | His932                        | H-bond side chain NE2 to apstatin N1 and Zn <sup>2+</sup> <sub>A</sub> |
| His496                        | H-bond side chain NE2 to apstatin O2                                                                                       | Arg941                        | Hydrophobic                                                            |
| Arg505                        | Hydrophobic                                                                                                                | Glu950                        | H-bond side chain OE1 to apstatin N5                                   |
| Glu522                        | 3 H-bonds to apstatin and metal coordination OE2 to Zn <sup>2+</sup> <sub>A</sub>                                          | Glu967                        | Metal coordination side chain OE2 to Zn <sup>2+</sup> <sub>A</sub>     |
| Arg534                        | Hydrophobic                                                                                                                | Arg979                        | 3 H-bonds side chain NH1 to apstatin O1, and NH2 to O1 and O2          |
| Glu536                        | 2 H-bonds to apstatin and metal coordination OE1 to Zn <sup>2+</sup> <sub>B</sub> and OE2 to Zn <sup>2+</sup> <sub>A</sub> | Gly981                        | Lost metal coordination                                                |
| Zn <sup>2+</sup> <sub>A</sub> | Coordination to apstatin O1                                                                                                | Zn <sup>2+</sup> <sub>A</sub> | Coordination to apstatin N1 and O1                                     |
| Zn <sup>2+</sup> <sub>B</sub> | Coordination to apstatin O1 and N1                                                                                         | -                             | -                                                                      |
